# Supplementary material for: Rifampin use in acute community-acquired meningitis in intensive care units: the French retrospective cohort ACAM-ICU study
Source: PubMed Central journal article supplement (PMC4549935; doi:10.1186/s13054-015-1021-7), 2015-08-26
Supplement: 13054_2015_1021_MOESM1_ESM.pdf [file 13054_2015_1021_MOESM1_ESM.pdf]

## **Supplementary data**

### Figures

Figure S1: Bacteria involved in 136 episodes of meningitis

Figure S2: Glasgow Outcome Scale for the groups of patients who did or did not receive rifampin for a community acquired meningitis (n=157)

Figure S3: Glasgow Outcome Scale for the groups of patients who did or not receive early rifampin (within the 24 first hours of hospitalization) or not for a community acquired meningitis (n=157)

### Tables

Table S1: Comparison of patient characteristics, severity at ICU admission, microbiological data and therapeutic measures between survivors and non survivors after ICU admission for pneumococcal meningitis (n=76)

Table S2: Factors associated with ICU mortality for a cohort of 76 patients admitted for pneumococcal meningitis

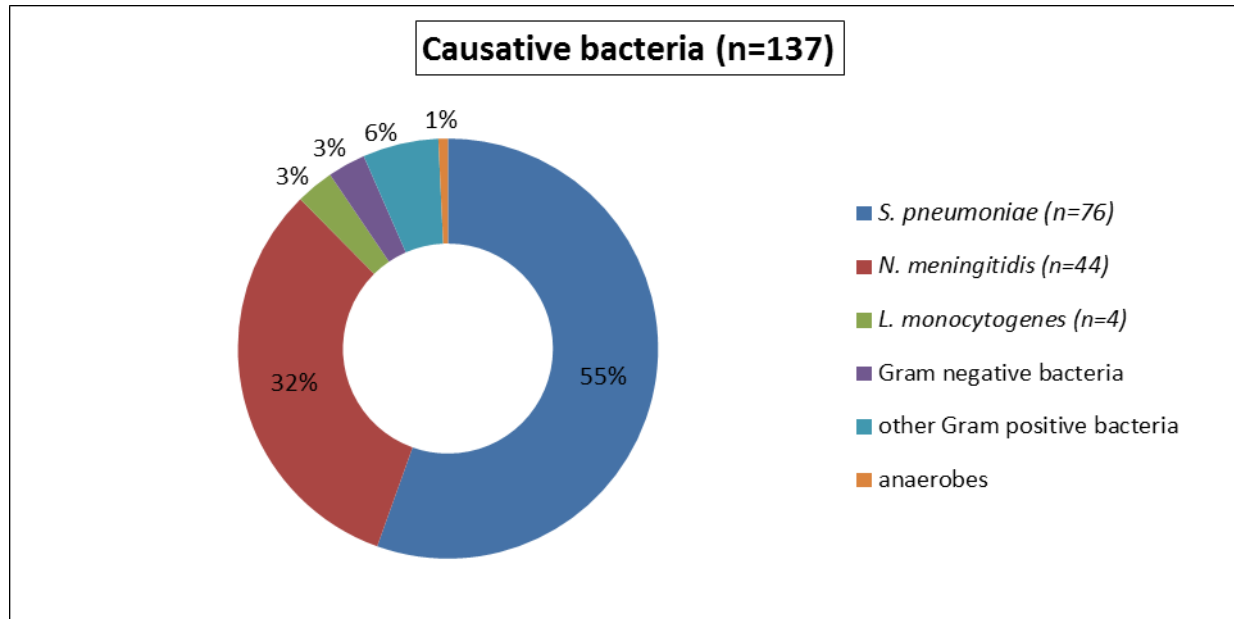

Figure S1: Bacteria involved in 136 episodes of meningitis

One patient had a co-infection so that 137 bacteria were involved in 136 infections.

Gram negative bacteria (n=4): *Haemophilus influenzae* (n=2), *Klebsiella pneumoniae* (n=1), *Capnocytophaga canimorsus* (n=1)

Other Gram positive bacteria (n=7): *Staphylococcus aureus* (n=2), *Streptococcus pyogenes* (n=2), *Streptococcus agalactiae* (n=2), *Streptococcus salivarius* (n=1), *Streptococcus intermedius* (n=1)

Anaerobes (n=1): *Fusobacterium sp.* (n=1; co-infection with *Streptococcus intermedius*)

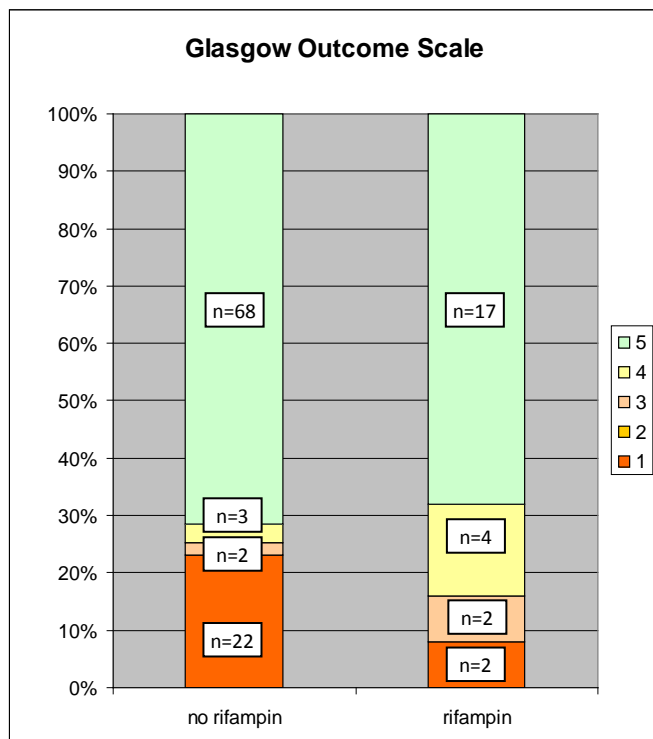

Figure S2: Glasgow Outcome Scale for the groups of patients who did or did not receive rifampin for a community-acquired meningitis

GOS at day 90 was available for 120 patients. None of them had a score of 2 (persistent vegetative state). Fisher's test showed statistical difference for GOS between the 2 subgroups of patients who had received or not rifampin ( $p=0.017$ )

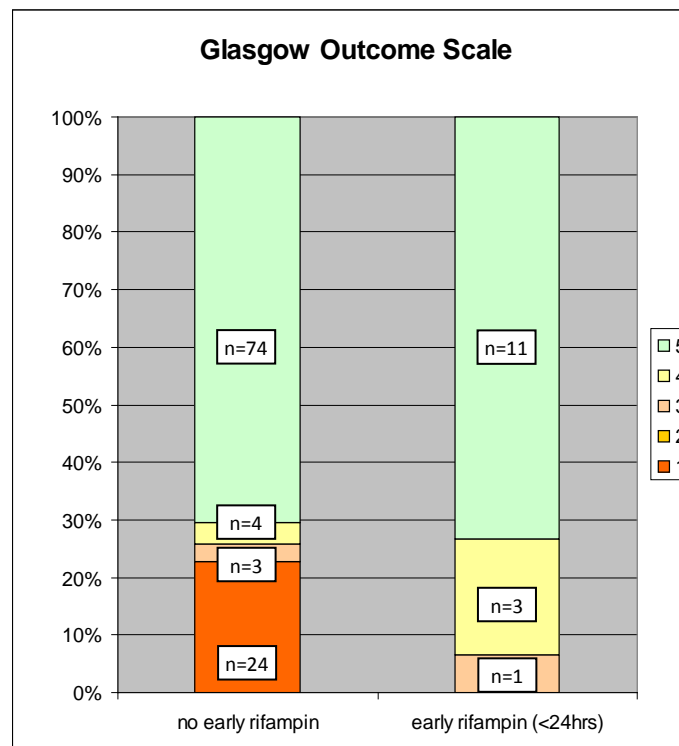

Figure S3: Glasgow Outcome Scale for the groups of patients who did or did not receive early rifampin (within the 24 first hours of hospitalization) or not for a community-acquired meningitis

GOS at day 90 was available for 120 patients. None of them had a score of 2 (persistent vegetative state) and no patient had a score of 1 in the 'early rifampin' group. Fisher's exact test showed statistical difference for GOS between the 2 subgroups of patients who had received early rifampin or no early rifampin ( $p=0.014$ )

|                                                                           | Non survivors<br>n=18 |             | Survivors<br>n=58 |             | p-value      |
|---------------------------------------------------------------------------|-----------------------|-------------|-------------------|-------------|--------------|
| <b>Patient characteristics</b>                                            |                       |             |                   |             |              |
| Age                                                                       | 67.2                  | [43.1 74.5] | 49.7              | [38.3 63.8] | 0.124        |
| Female sex                                                                | 3/18                  | 16,7%       | 25/58             | 43,1%       | 0.053        |
| Immunosuppression                                                         | 6/18                  | 33,3%       | 15/58             | 25,9%       | NS           |
| Alcohol use disorder                                                      | 4/18                  | 22,2%       | 9/56              | 16,1%       | NS           |
| Asplenia                                                                  | 1/18                  | 5,6%        | 3/58              | 5,2%        | NS           |
| HIV infection                                                             | 2/18                  | 11,1%       | 3/57              | 5,3%        | NS           |
| <b>Severity at ICU admission</b>                                          |                       |             |                   |             |              |
| Glasgow Coma Scale                                                        | 6                     | [3 7]       | 10                | [8 13]      | <0.001       |
| SAPS2                                                                     | 65                    | [53 77]     | 33                | [24 44]     | <0.001       |
| Depressed conscious level                                                 | 17/17                 | 100,0%      | 34/45             | 75,6%       | <b>0.026</b> |
| Respiratory failure                                                       | 16/17                 | 94,1%       | 24/45             | 53,3%       | <b>0.003</b> |
| Hematological failure                                                     | 9/17                  | 52,9%       | 24/45             | 53,3%       | NS           |
| Cardiovascular failure                                                    | 10/17                 | 58,8%       | 13/45             | 28,9%       | <b>0.041</b> |
| Renal failure                                                             | 9/17                  | 52,9%       | 8/45              | 17,8%       | <b>0.01</b>  |
| Hepatic failure                                                           | -                     |             | -                 |             |              |
| <b>Microbiology</b>                                                       |                       |             |                   |             |              |
| CSF white-cell count per mm <sup>3</sup>                                  | 1500                  | [290 3100]  | 1740              | [388 5300]  | NS           |
| CSF protein rate g/L                                                      | 8.7                   | [5.1 10.7]  | 3.2               | [2.3 5.9]   | <b>0.001</b> |
| Positive direct examination of CSF                                        | 13/17                 | 76,5%       | 48/58             | 82,8%       | NS           |
| <b>Therapeutic measures</b>                                               |                       |             |                   |             |              |
| Time between hospital admission and first dose of antibiotic (hours)      | 3.8                   | [1.5 7]     | 2.5               | 1 7         | NS           |
| Combination of antibiotics as initial therapy                             | 17/18                 | 94,4%       | 55/58             | 94,8%       | NS           |
| Treatment with rifampin during the hospitalization                        | 2/18                  | 11,1%       | 18/58             | 31,0%       | 0.129        |
| Early treatment with rifampin (within the 24 first hours)                 | 0/18                  | 0,0%        | 13/58             | 22,4%       | <b>0.031</b> |
| Treatment with vancomycin during the hospitalization                      | 15/18                 | 83,3%       | 47/58             | 81,0%       | NS           |
| Early treatment with vancomycin (within the 24 first hours)               | 12/18                 | 66,7%       | 40/58             | 69,0%       | NS           |
| Treatment with corticosteroids during the hospitalization                 | 14/18                 | 77,8%       | 48/58             | 82,8%       | NS           |
| Time between hospital admission and first dose of corticosteroids (hours) | 8                     | [5.6 13]    | 5.6               | [1.6 7.5]   | <b>0.034</b> |

Table S1: Comparison of patient characteristics, severity at ICU admission, microbiological data and therapeutic measures between survivors and non survivors after ICU admission for pneumococcal meningitis (n=76)

Data are proportion (%) of patients or median values [interquartile range].  
P-value<.2 are detailed. P-value<.05 were considered significant (bold).

|                                          | OR   | 95% IC |        | <i>p</i>     |
|------------------------------------------|------|--------|--------|--------------|
| Cardiovascular failure                   | 7.5  | [1.3   | 44.2]  | <b>0.027</b> |
| Renal failure                            | 7.5  | [1.3   | 44.2]  | <b>0.027</b> |
| Respiratory failure                      | 21.6 | [1.2   | 404.5] | <b>0.040</b> |
| Early antibiotics administration (<2hrs) |      |        |        | NS           |
| Hematological failure                    |      |        |        | NS           |
| Age (>75)                                |      |        |        | NS           |
| Corticosteroids administration           |      |        |        | NS           |
| Female sex                               |      |        |        | NS           |
| Immunosuppression                        |      |        |        | NS           |
| Early treatment with rifampin (<24hrs)   |      |        |        | NS           |

Table S2: Factors associated with ICU mortality for a cohort of 76 patients admitted for pneumococcal meningitis

Incomplete observations were excluded from the binary logistic analysis. The presented model is from 62 observations and yielded the highest likelihood ratio.

*P-value*<.2 are detailed. *P-value*<.05 were considered significant (bold).
